# Supplementary material for: Spatial Distribution Characteristics of Suitable Planting Areas for Pyrus Species under Climate Change in China
Source: MDPI journal article supplement (doi:10.3390/plants12071559), 2023-04-05
Supplement: s1 [file s1]

# SUPPLEMENTARY INFORMATION:

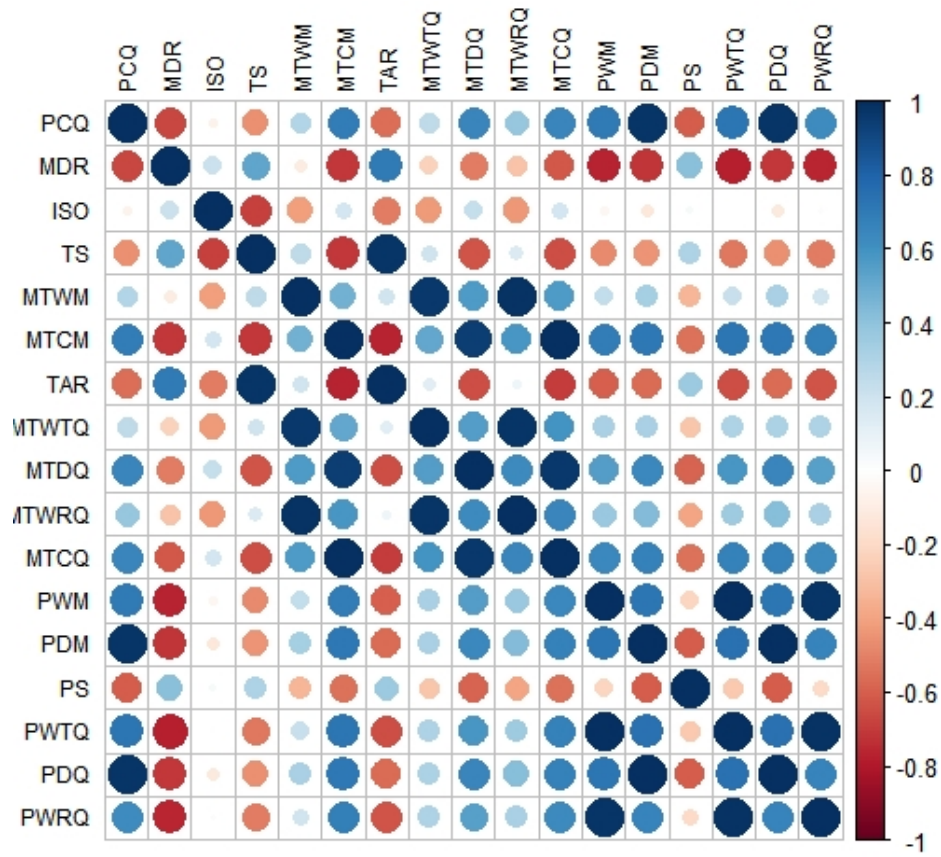

Figure S1. Correlation analysis table of 17 environmental variables

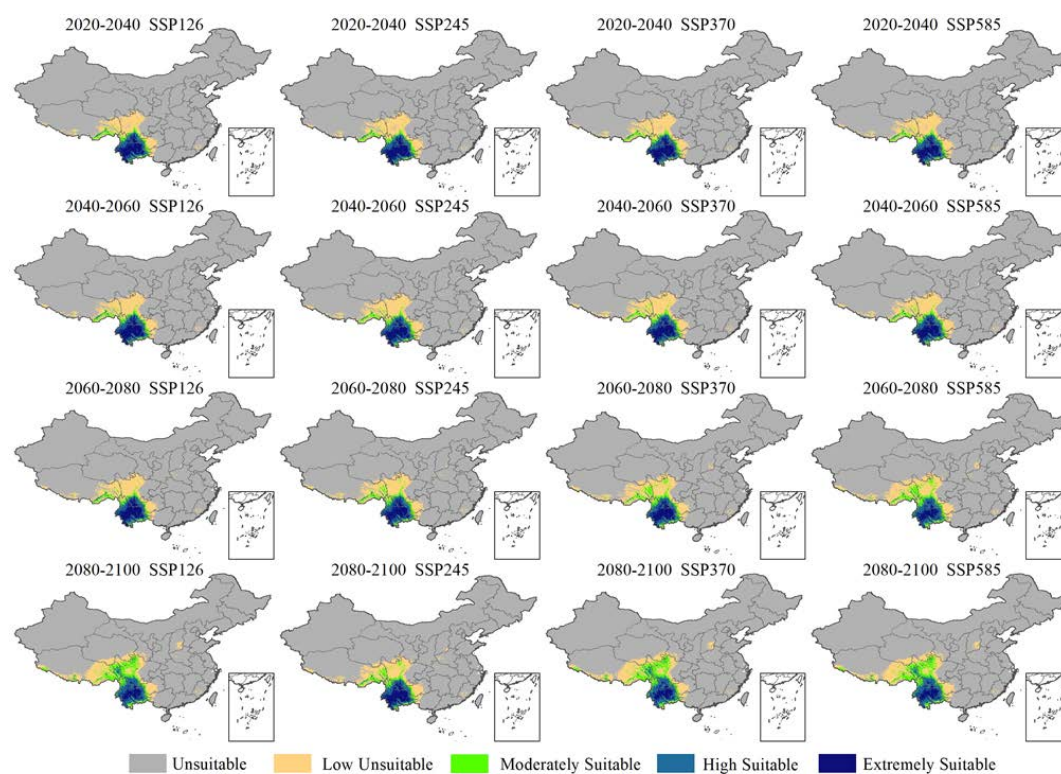

Figure S2. Distribution map of climatically suitable areas of *P. pashia* under future climatic conditions

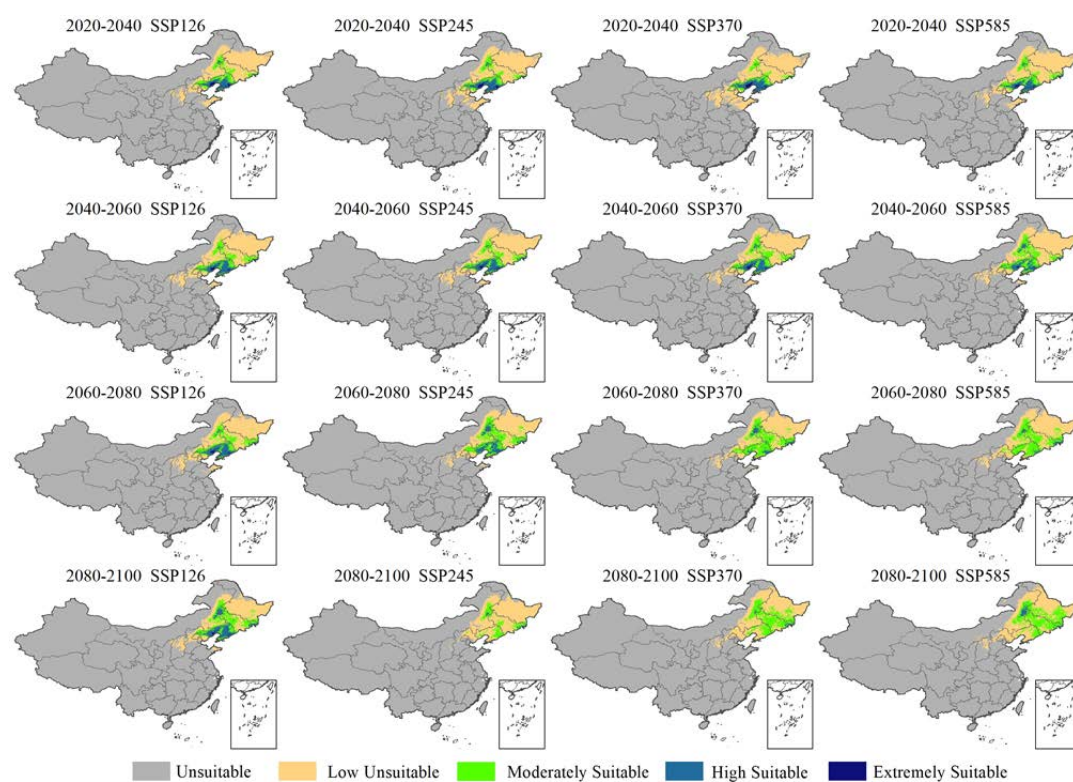

Figure S3. Distribution map of climatically suitable areas of *P. ussuriensis* under future climatic conditions

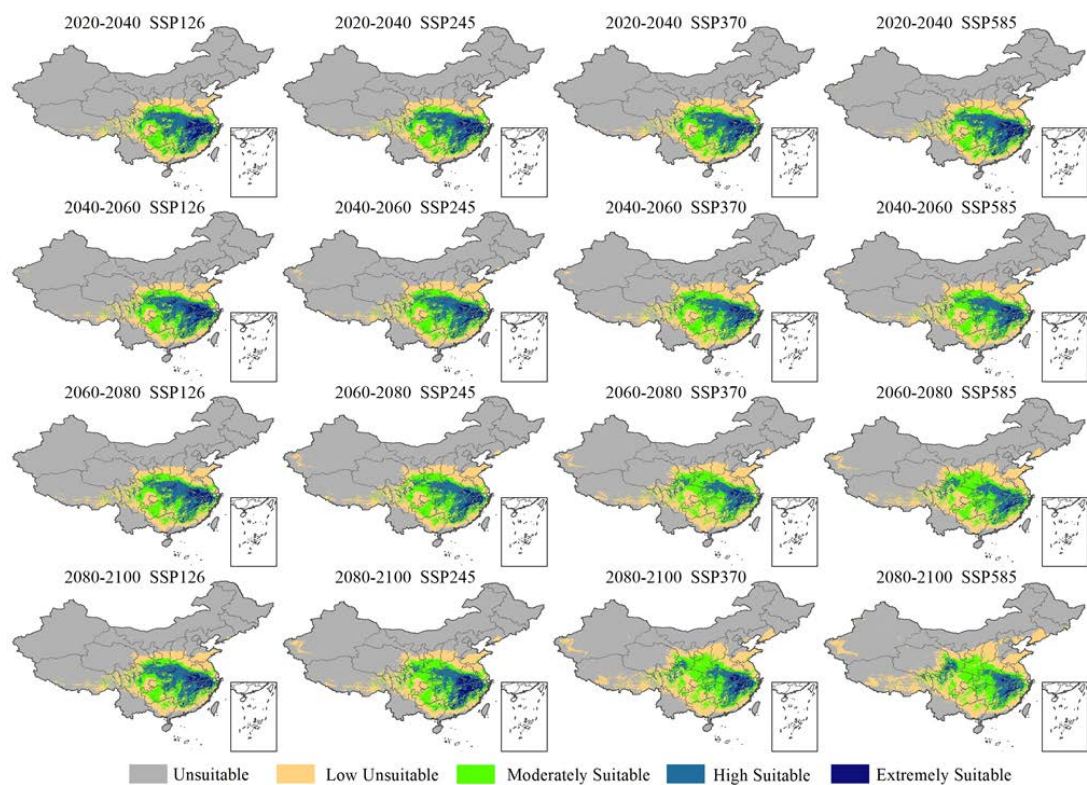

Figure S4. Distribution map of climatically suitable areas of *P. pyrifolia* under future climatic conditions

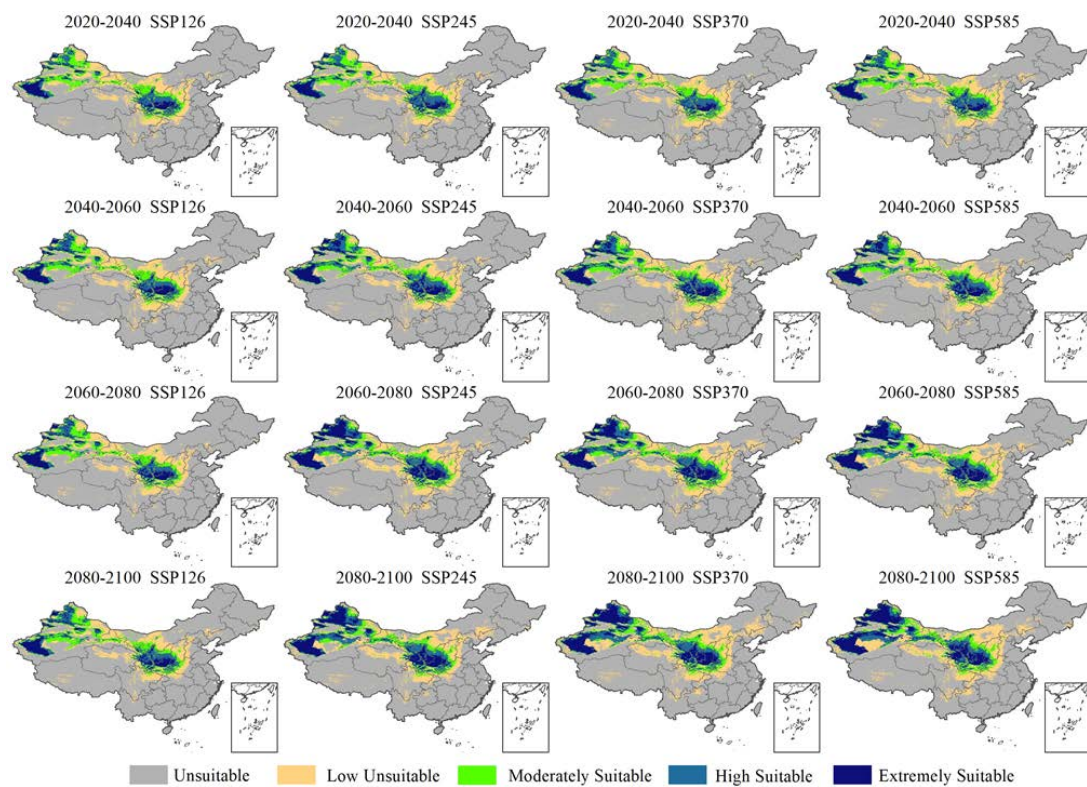

Figure S5. Distribution map of climatically suitable areas of *P. sinkiangensis* under future climatic conditions
